# Supplementary material
Source: Springer Nature journal article supplement (https://www.springermedizin.de/resource/supplementary/13046_2010_343_MOESM4_ESM.pdf/9662162)

**A**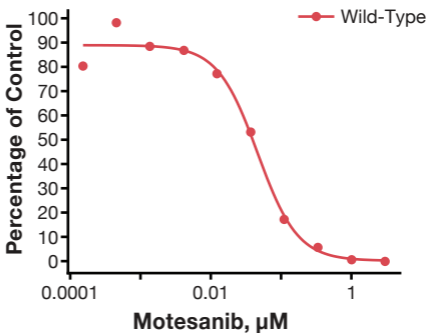**B**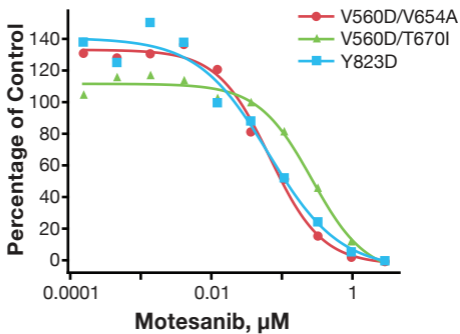**C**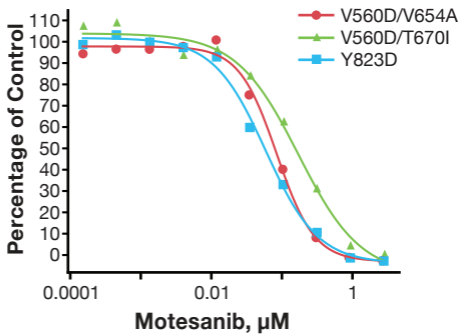

Supplement: MOESM4 [file 9662162]
